# Supplementary material
Source: PubMed Central journal article supplement (PMC3015110)
Supplement: supp_tpc.110.079087_Salome_Supp_materialps.pdf [file supp_tpc.110.079087_Salome_Supp_materialps.pdf]

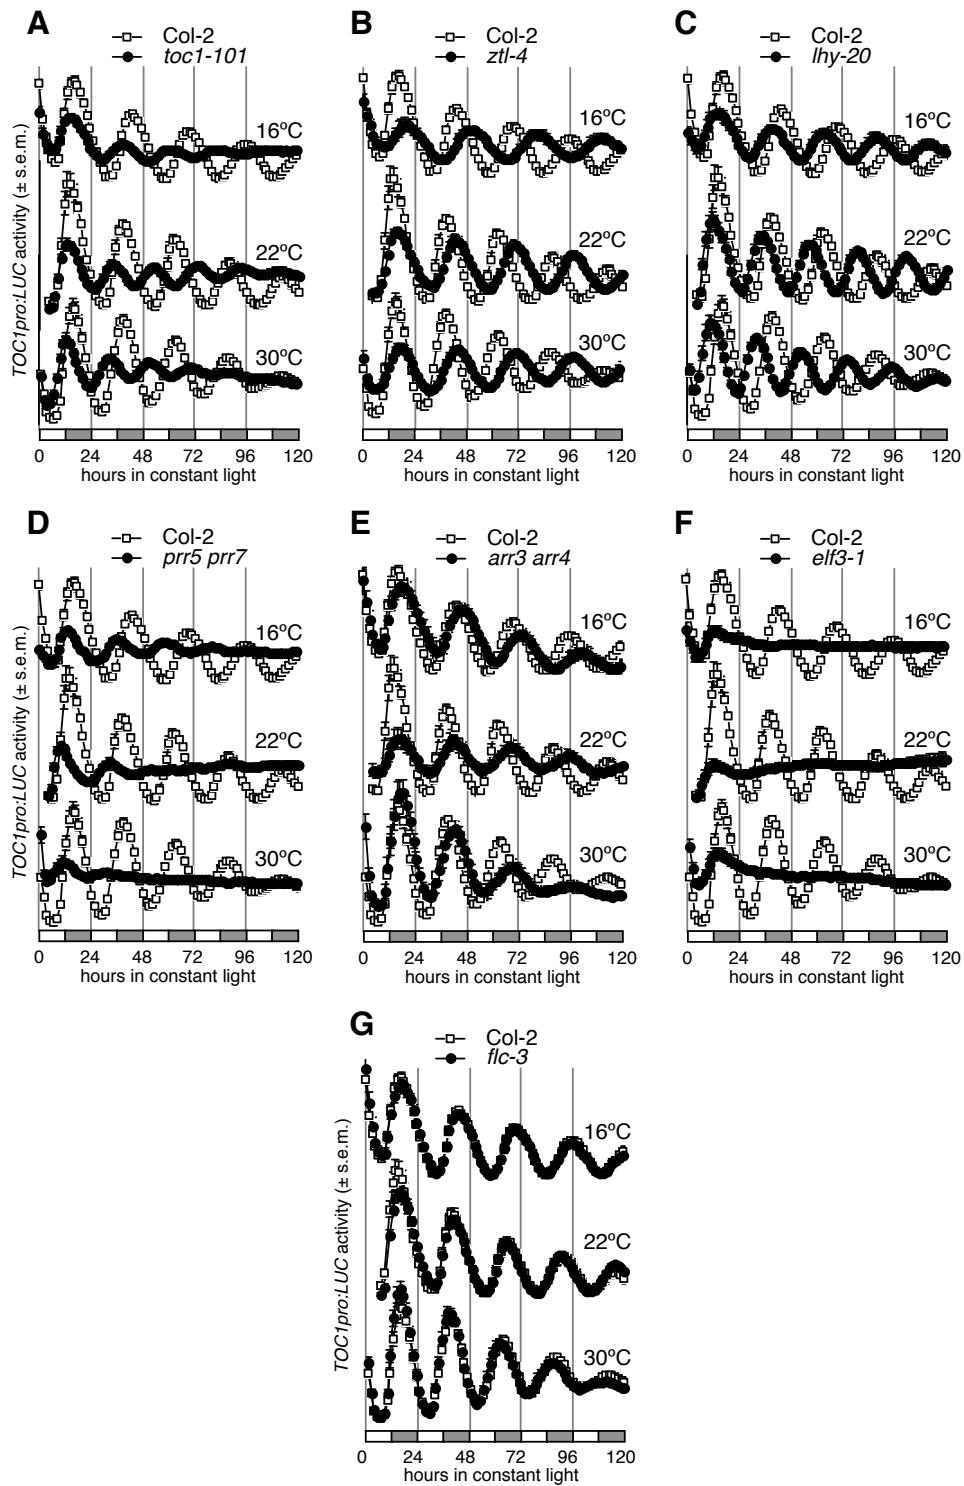

**Supplemental Figure 1. Mean traces of mutants tested for temperature compensation defects.**

The circadian behavior of all mutants (*toc1-101* (A), *ztl-4* (B), *lhy-20* (C), *prr5 prr7* (D), *arr3 arr4* (E), *elf3-1* (F) and *flc-3* (G)) was tested at 16°C, 22°C and 30°C. All traces were normalized to the mean value for each genotype, and shown as the average of 12-24 seedlings  $\pm$  s.e.m..

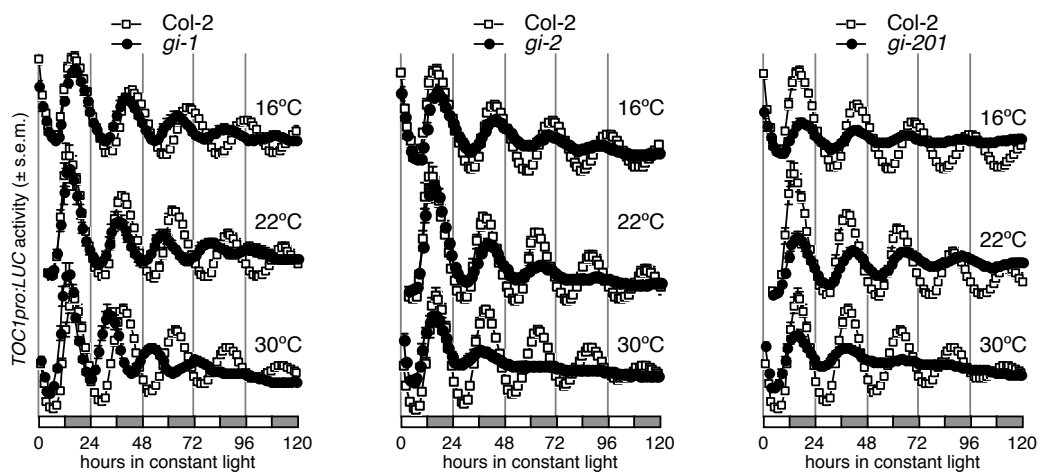

**Supplemental Figure 2. Mean traces of *gigantea* mutants tested for temperature compensation defects.**

The circadian behavior of all mutants (*gi-1* (A), *gi-2* (B) and *gi-201* (C)) was tested at 16°C, 22°C and 30°C. All traces were normalized to the mean value for each genotype, and shown as the average of 12-24 seedlings ± s.e.m..

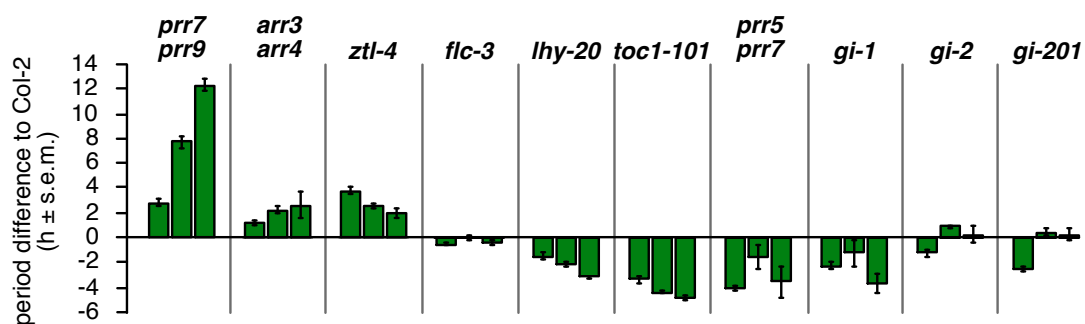

**Supplemental Figure 3. Normalized changes in free-running period in mutants.**

Periods in all mutant backgrounds were normalized to wild-type period for each temperature (by subtracting Col-2 free-running period at each temperature from all mutant periods) and plotted as h difference relative to wild type. Negative values indicate short periods in the mutants, while positive values represent long periods.

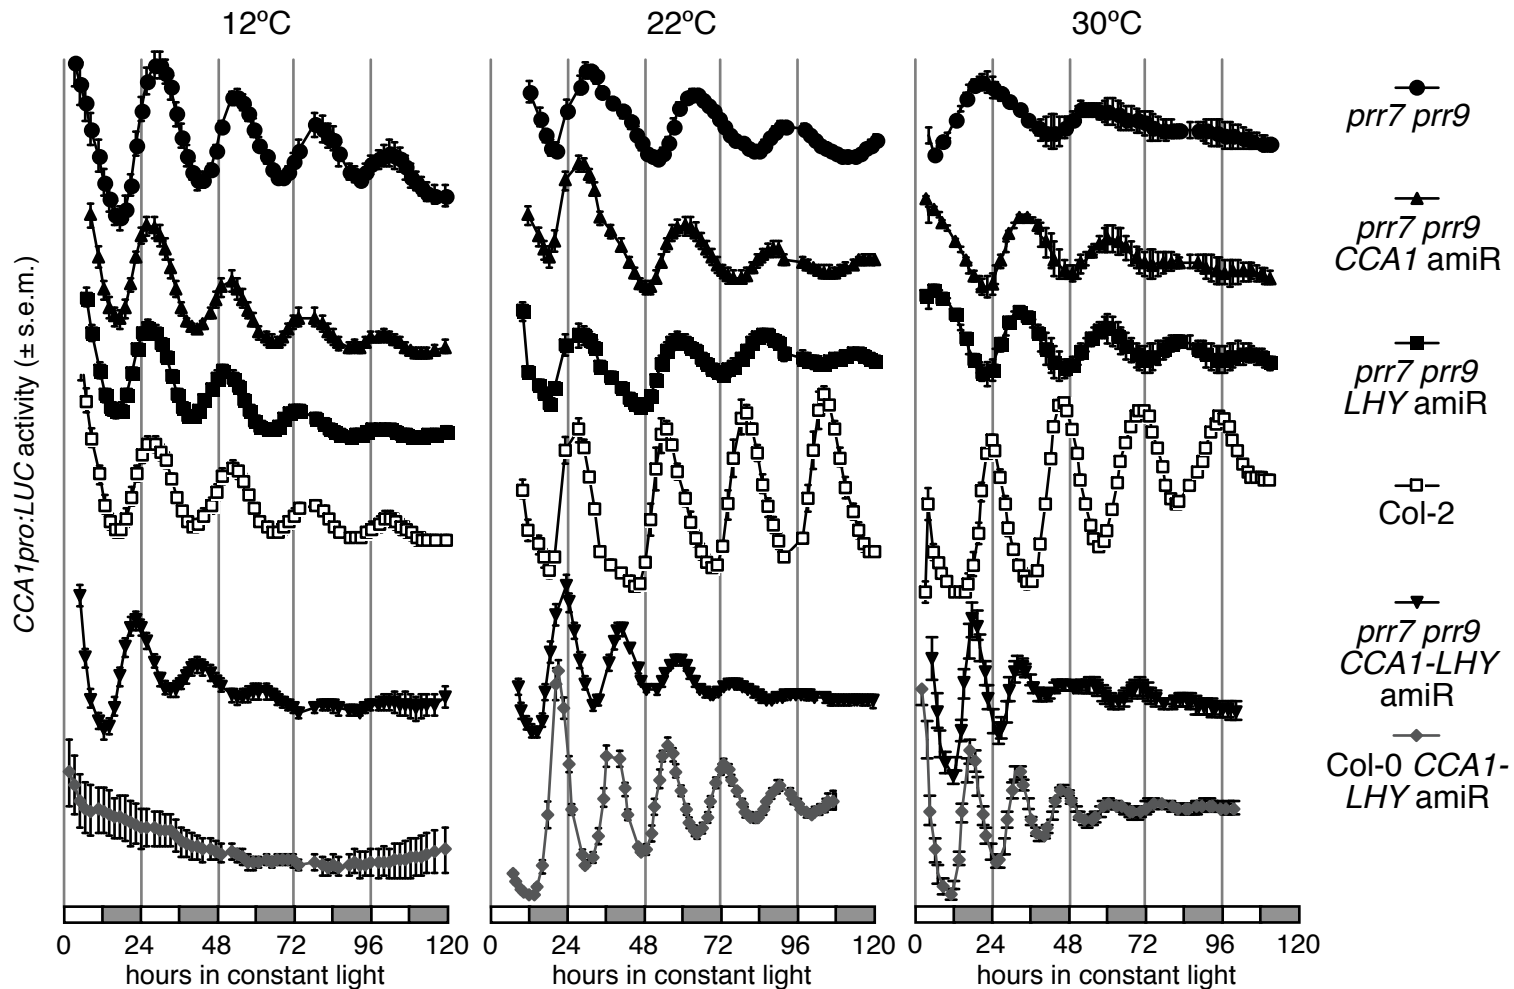

**Supplemental Figure 4. Mean traces of Col-0, *prr7 prr9* and *prr7 prr9 amiR* lines tested for temperature compensation defects.**

The circadian behavior of all lines was tested at 12°C, 22°C and 30°C. All traces were normalized to the mean value for each genotype, and shown as the average of 12-24 seedlings  $\pm$  s.e.m.

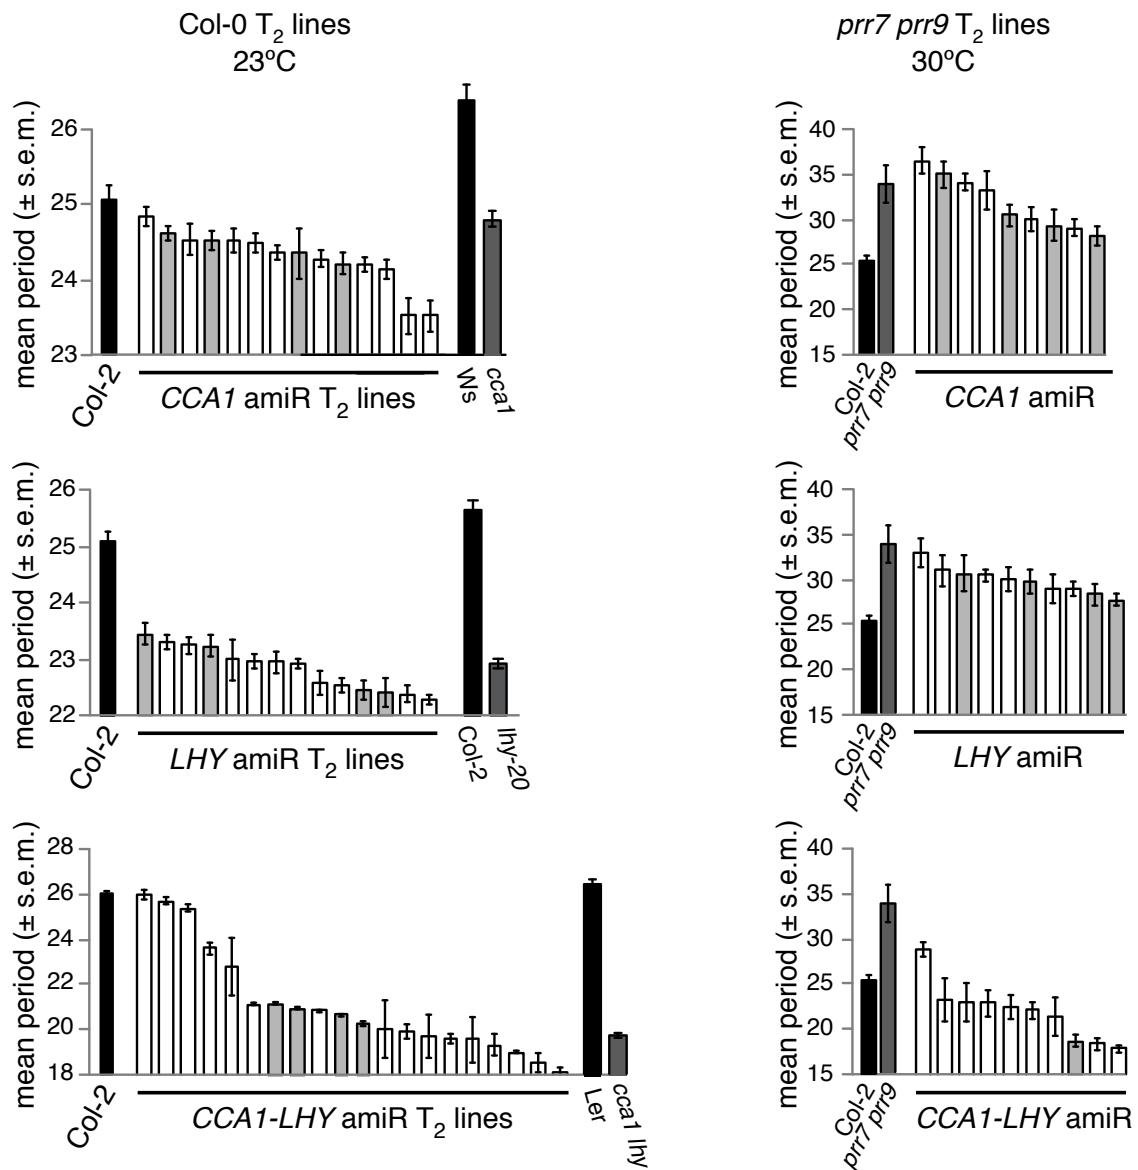

**Supplemental Figure 5. Mean circadian periods in Col-0 at 22°C and *prr7 prr9* at 30°C for all lines tested.**

Seedlings were grown under light-dark cycles at 22°C before being released in constant light at 22°C (for Col-0 lines) or at 30°C (for *prr7 prr9* lines). All T<sub>2</sub> lines tested are shown here. Selected T<sub>2</sub> lines in the Col-0 and *prr7 prr9* backgrounds included in all analyses are shaded in grey. All period values are given as means ± s.e.m. (n=12).

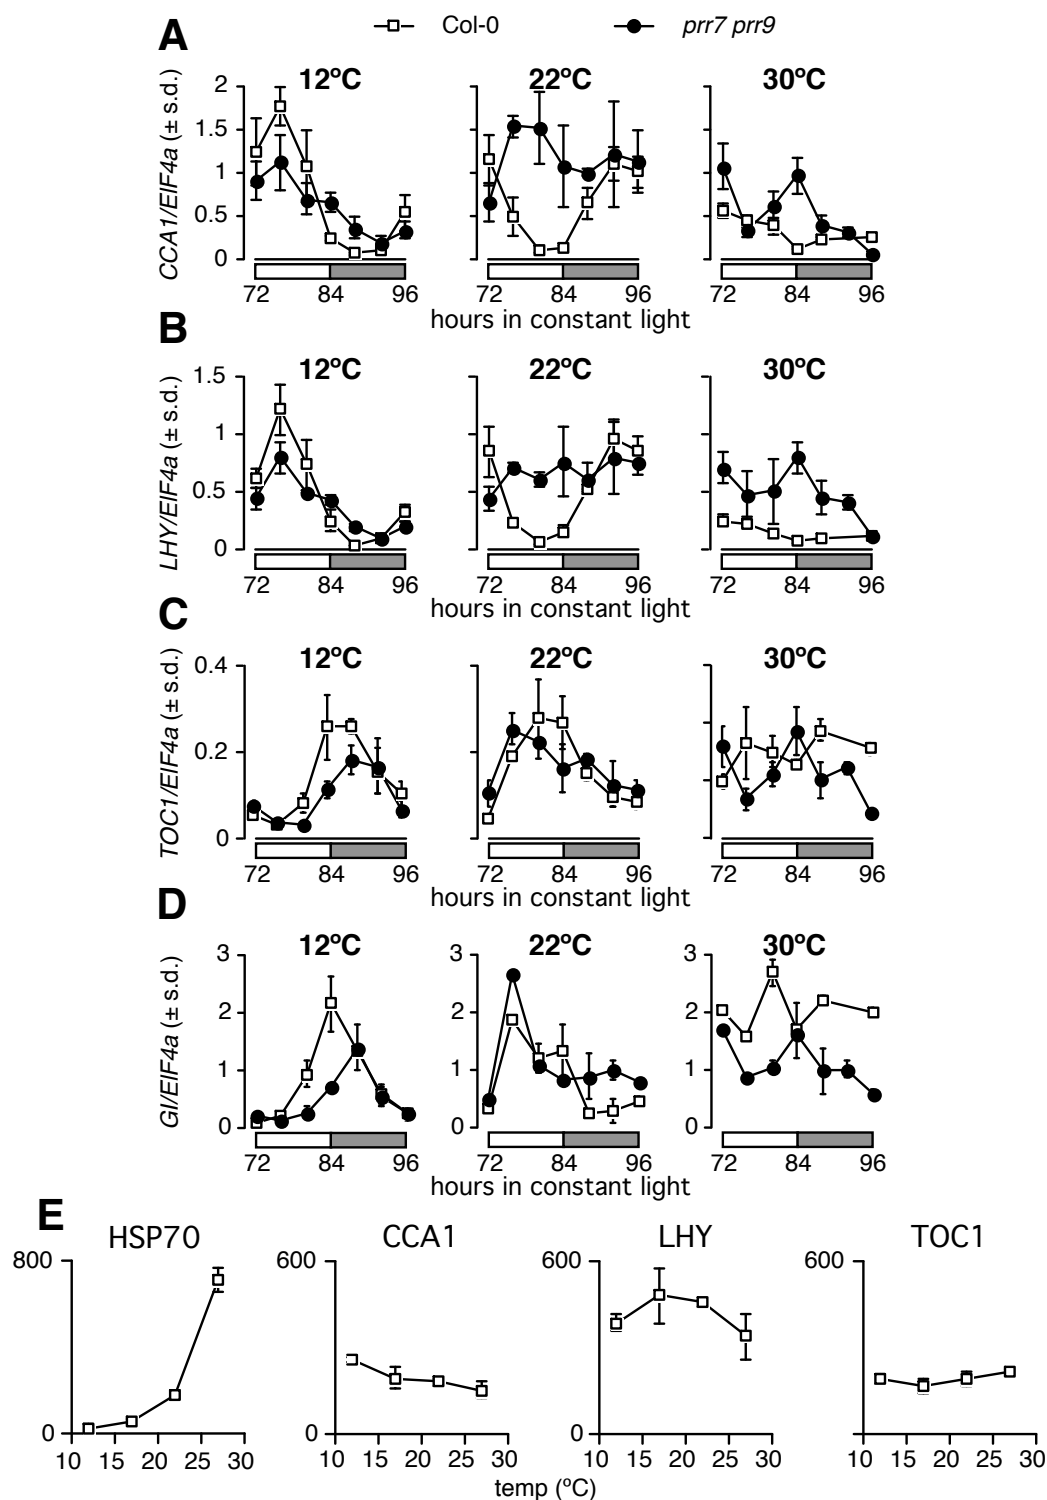

**Supplemental Figure 6. Expression of clock genes in Col-0 and *prp7 prp9*.**

- (A) Expression of *CCA1* in Col-0 and *prp7 prp9* at 12°C, 22°C and 30°C. Mean  $\pm$  s.d. (n=2).  
 (B) Expression of *LHY* in Col-0 and *prp7 prp9* at 12°C, 22°C and 30°C. Mean  $\pm$  s.d. (n=2).  
 (C) Expression of *TOC1* in Col-0 and *prp7 prp9* at 12°C, 22°C and 30°C. Mean  $\pm$  s.d. (n=2).  
 (D) Expression of *GI* in Col-0 and *prp7 prp9* at 12°C, 22°C and 30°C. Mean  $\pm$  s.d. (n=2).  
 (E) Expression of the clock genes does not significantly respond to changes in ambient temperature. Expression levels were taken from (Gould et al., 2006), and are shown as means  $\pm$  s.d. (n=3).

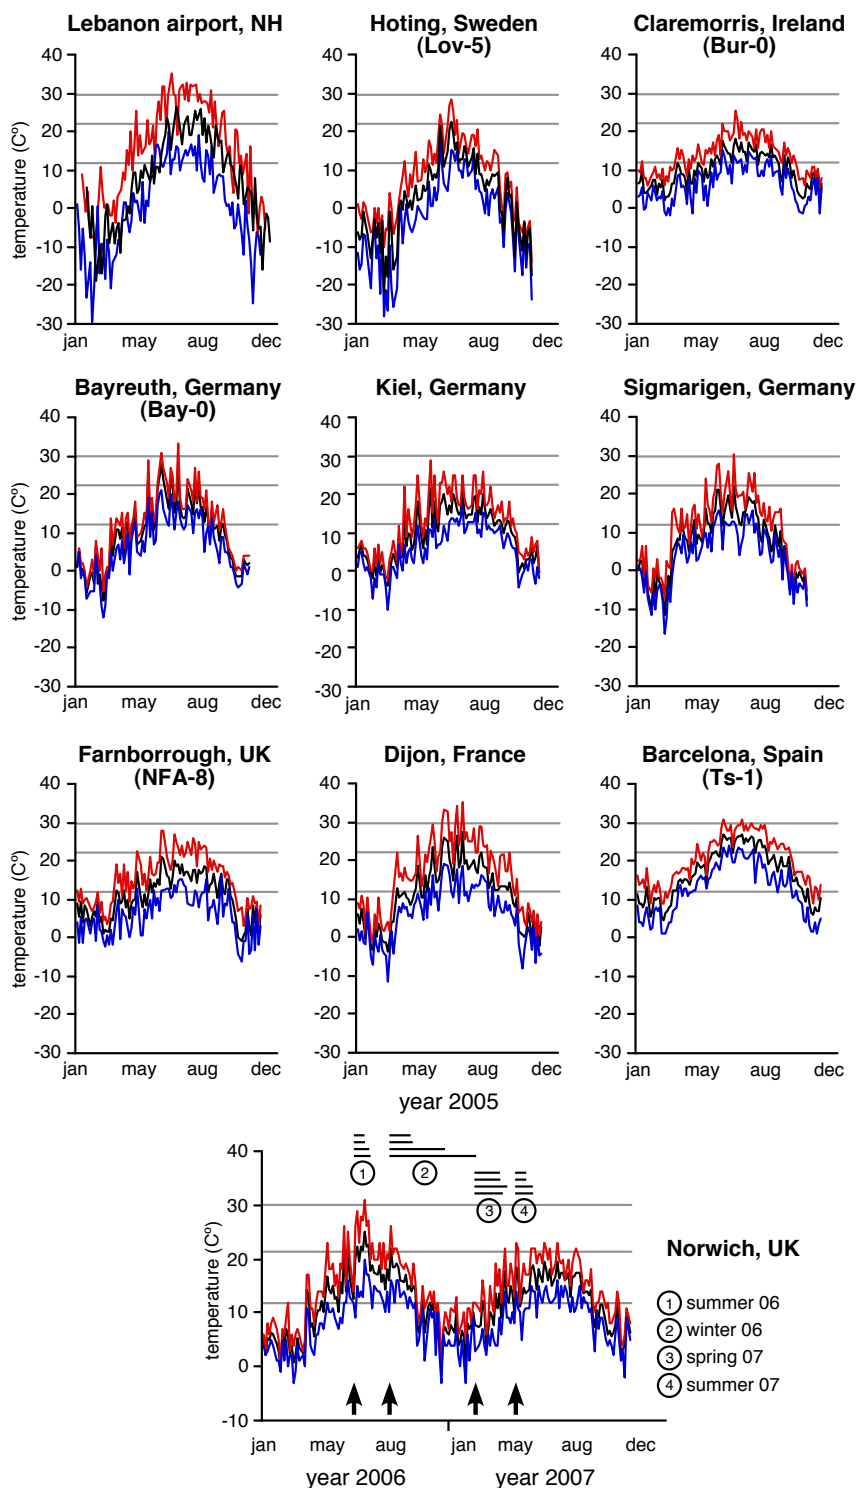

**Supplemental Figure 7. Daily temperature variation across 9 locations for the year 2005.**

The daily maximum (red), mean (black) and minimum (blue) temperatures for quality controlled data were downloaded from the National Climatic Data Center (<http://www7.ncdc.noaa.gov/CDO/cdoselect.cmd?datasetabbv=GSOD&resolution=40>) for the year 2005, or for 2006 and 2007 in the case of Norwich. When possible, the weather station closest to an accession collection site was chosen.

Flowering time data for Ler, Col-0, *gi-2* and *FRI-Sf2* lines are replotted from (Wilczek et al., 2009). Each horizontal bar indicates the number of days until bolting from the time of sowing for the Summer 2006, Fall 2006, Spring 2007 and Summer 2007 cohorts. From top to bottom, the order of genotypes is Ler, Col-0, *gi-2*, *FRI-Sf2*.

**Supplemental Table 1. Circadian periods (mean  $\pm$  s.e.m.) and Relative Amplitude Errors (RAE) of all genotypes in this study.**

| genotype         | temperature | period (h)      | RAE  | RAE range   | n  |
|------------------|-------------|-----------------|------|-------------|----|
| Col-2            | 16°C        | 25.9 $\pm$ 0.1  | 0.20 | 0.15 – 0.28 | 12 |
|                  | 22°C        | 24.3 $\pm$ 0.2  | 0.23 | 0.13 – 0.49 | 12 |
|                  | 30°C        | 23.5 $\pm$ 0.3  | 0.24 | 0.12 – 0.38 | 12 |
| <i>prr7 prr9</i> | 16°C        | 28.1 $\pm$ 0.3  | 0.24 | 0.15 – 0.32 | 12 |
|                  | 22°C        | 32.1 $\pm$ 0.5  | 0.23 | 0.10 – 0.42 | 12 |
|                  | 30°C        | 36.4 $\pm$ 0.5  | 0.21 | 0.12 – 0.27 | 12 |
| <i>lhy-20</i>    | 16°C        | 24.5 $\pm$ 0.3  | 0.18 | 0.11 – 0.40 | 12 |
|                  | 22°C        | 22.2 $\pm$ 0.1  | 0.16 | 0.09 – 0.24 | 12 |
|                  | 30°C        | 20.7 $\pm$ 0.1  | 0.25 | 0.13 – 0.45 | 12 |
| <i>toc1-101</i>  | 16°C        | 22.4 $\pm$ 0.4  | 0.37 | 0.26 – 0.65 | 11 |
|                  | 22°C        | 19.5 $\pm$ 0.2  | 0.23 | 0.14 – 0.33 | 10 |
|                  | 30°C        | 18.8 $\pm$ 0.1  | 0.42 | 0.30 – 0.61 | 12 |
| <i>ztl-4</i>     | 16°C        | 28.6 $\pm$ 0.3  | 0.28 | 0.13 – 0.57 | 12 |
|                  | 22°C        | 26.9 $\pm$ 0.15 | 0.15 | 0.07 – 0.31 | 11 |
|                  | 30°C        | 26.9 $\pm$ 0.2  | 0.15 | 0.09 – 0.23 | 7  |
| <i>prr5 prr7</i> | 16°C        | 22.1 $\pm$ 0.2  | 0.41 | 0.25 – 0.62 | 12 |
|                  | 22°C        | 22.8 $\pm$ 0.9  | 0.56 | 0.50 – 0.62 | 11 |
|                  | 30°C        | 20.3 $\pm$ 1.3  | 0.62 | 0.45 – 0.71 | 12 |
| <i>arr3 arr4</i> | 16°C        | 26.9 $\pm$ 0.15 | 0.20 | 0.14 – 0.40 | 12 |
|                  | 22°C        | 27.1 $\pm$ 0.25 | 0.20 | 0.12 – 0.29 | 12 |
|                  | 30°C        | 27.2 $\pm$ 0.2  | 0.20 | 0.10 – 0.30 | 12 |
| <i>flc-3</i>     | 16°C        | 25.6 $\pm$ 0.1  | 0.25 | 0.12 – 0.39 | 12 |
|                  | 22°C        | 24.3 $\pm$ 0.2  | 0.19 | 0.11 – 0.27 | 12 |
|                  | 30°C        | 23.4 $\pm$ 0.2  | 0.26 | 0.19 – 0.37 | 12 |
| <i>gi-1</i>      | 16°C        | 23.9 $\pm$ 0.3  | 0.27 | 0.19 – 0.35 | 12 |
|                  | 22°C        | 23.1 $\pm$ 1.0  | 0.38 | 0.23 – 0.51 | 12 |
|                  | 30°C        | 20.1 $\pm$ 0.8  | 0.43 | 0.22 – 0.78 | 12 |
| <i>gi-2</i>      | 16°C        | 24.9 $\pm$ 0.3  | 0.43 | 0.24 – 0.66 | 12 |
|                  | 22°C        | 25.3 $\pm$ 0.1  | 0.52 | 0.35 – 0.76 | 12 |
|                  | 30°C        | 24.1 $\pm$ 0.7  | 0.57 | 0.45 – 0.69 | 12 |
| <i>gi-201</i>    | 16°C        | 23.7 $\pm$ 0.2  | 0.40 | 0.25 – 0.58 | 12 |
|                  | 22°C        | 24.8 $\pm$ 0.3  | 0.30 | 0.22 – 0.36 | 12 |
|                  | 30°C        | 24.1 $\pm$ 0.5  | 0.58 | 0.44 – 0.69 | 12 |



**Supplemental Table 2. List of constructs.**

| Clone name | Target gene             | Type of clone, selection* |
|------------|-------------------------|---------------------------|
| pINT098    | <i>CCA1</i>             | Entry clone, kanamycin    |
| pINT294    | <i>LHY</i>              | Entry clone, kanamycin    |
| pINT307    | <i>CCA1-LHY</i>         | Entry clone, kanamycin    |
| pINT511    | <i>TOC1</i>             | Entry clone, kanamycin    |
| pINT314    | <i>ZTL</i>              | Entry clone, kanamycin    |
| pINT315    | <i>PRR7-PRR9</i>        | Entry clone, kanamycin    |
| pINT275    | NA (destination vector) | Binary, kanamycin         |
| pINT276    | NA (destination vector) | Binary, BASTA             |
| pINT425    | <i>CCA1</i>             | Binary, Basta             |
| pINT406    | <i>LHY</i>              | Binary, Basta             |
| pINT346    | <i>CCA1-LHY</i>         | Binary, kanamycin         |
| pINT480    | <i>CCA1-LHY</i>         | Binary, Basta             |
| pINT514    | <i>TOC1</i>             | Binary, Basta             |
| pINT408    | <i>ZTL</i>              | Binary, Basta             |
| pINT444    | <i>PRR7-PRR9</i>        | Binary, Basta             |

\* Listed selection for Entry clones refer to antibiotic selection in *E. coli*, and selection for Binary clones to the selection for transgenic plants.

**Supplemental Table 3. amiRNA sequences.**

| gene        | amiRNA sequence (5' to 3') |
|-------------|----------------------------|
| <i>CCA1</i> | UGAUCGGUUAUAUUGGAGCUC      |
| <i>LHY</i>  | UAGUUGAGAAUGGAACGCACG      |
| <i>TOC1</i> | UAGUCGCCUAAUUUAUCCCGU      |
| <i>ZTL</i>  | UGUCAACUAAUGGAUGCGCUC      |
| <i>PRR7</i> | UAACGAUUAACGAGUGCGGU       |
| <i>PRR9</i> | UUAAAUACUAUCAGGACGCCU      |

**Supplemental Table 4. qPCR primers.**

| ID      | Gene                      | Sequence (5' to 3')                     | Direction |
|---------|---------------------------|-----------------------------------------|-----------|
| G-27440 | <i>CCA1</i> <sup>1</sup>  | CCT CAA ACT TCA GAG TCC AAT GC          | sense     |
| G-27441 | <i>CCA1</i> <sup>1</sup>  | GAC CCT CGT CAG ACA CAG ACT TC          | antisense |
| G-27442 | <i>LHY</i> <sup>1</sup>   | GAA GTC TCC GAA GAG GGT CG              | sense     |
| G-27443 | <i>LHY</i> <sup>1</sup>   | TAT TCA CAT TCT CTG CCA CTT GAG         | antisense |
| G-26630 | <i>TOC1</i>               | GCT ATG AAC AGA AGT AAA GAT TCG         | sense     |
| G-16718 | <i>TOC1</i>               | GGA TAT CCC GTC ATT CCA TTC GGA         | antisense |
| G-19623 | <i>GI</i> <sup>2</sup>    | ACC AAC GGA TAG TCA AAG TGT TGG         | sense     |
| G-19624 | <i>GI</i> <sup>2</sup>    | AAG CTA GCA CCG GCT GTA TTG CTC         | antisense |
| G-9789  | <i>HSP70</i> <sup>3</sup> | AGG AGC TCG AGT CTC TTT GC              | sense     |
| G-9790  | <i>HSP70</i> <sup>3</sup> | AGG TGT GTC GTC ATC CAT TC              | antisense |
| G-26631 | <i>EIF4a</i>              | GCG CAT CCT CCA AGC TGG TGT CC          | sense     |
| G-26632 | <i>EIF4a</i>              | GGT GGA AGA AGC TGG AAT ATG TCA TAG ATC | antisense |

<sup>1</sup> from (Kanno et al., 2010).

<sup>2</sup> correspond to *gi-1* genotyping primers; *gi-1* carries a small 5-bp deletion in the 3' end of the *GI* gene (Park et al., 1999).

<sup>3</sup> from (Balasubramanian et al., 2006).

#### **SUPPLEMENTAL REFERENCES:**

- Balasubramanian, S., Sureshkumar, S., Lempe, J., and Weigel, D. (2006).** Potent induction of *Arabidopsis thaliana* flowering by elevated growth temperature. PLoS Genet. **2**, e106.
- Gould, P.D., Locke, J.C.W., Larue, C., Southern, M.M., Davis, S.J., Hanano, S., Moyle, R., Milich, R., Putterill, J., Millar, A.J., and Hall, A. (2006).** The molecular basis of temperature compensation in the *Arabidopsis* circadian clock. Plant Cell **18**, 1177-1187.
- Kanno, T., Bucher, E., Daxinger, L., Huettel, B., Kreil, D.P., Breinig, F., Lind, M., Schmitt, M.J., Simon, S.A., Gurazada, S.G.R., Meyers, B.C., Lorkovic, Z.J., Matzke, A.J.M., and Matzke, M. (2010).** RNA-directed DNA methylation and plant development require an IWR1-type transcription factor. EMBO Rep. **11**, 65-71.
- Park, D.H., Somers, D.E., Kim, Y.S., Choy, Y.H., Lim, H.K., Soh, M.S., Kim, H.J., Kay, S.A., and Nam, H.G. (1999).** Control of circadian rhythms and photoperiodic flowering by the *Arabidopsis* *GIGANTEA* gene. Science **285**, 1579-1582.
- Salomé, P.A., and McClung, C.R. (2005).** What makes *Arabidopsis* tick: Light and temperature entrainment of the circadian clock. Plant Cell Environ. **28**, 21-38.
- Wilczek, A.M., Roe, J.L., Knapp, M.C., Cooper, M.D., Lopez-Gallego, C., Martin, L.J., Muir, C.D., Sim, S., Walker, A., Anderson, J., Egan, J.F., Moyers, B.T., Petipas, R., Giakountis, A., Charbit, E., Coupland, G., Welch, S.M., and Schmitt, J. (2009).** Effects of genetic perturbation on seasonal life history plasticity. Science **323**, 930-934.
- Xu, X., Xie, Q., and McClung, C.R. (2010).** Robust circadian rhythms of gene expression in *Brassica rapa* tissue culture Plant Physiol. **153**, 841-850.
